# Supplementary material for: Discriminate sensing of pyrophosphate using a new tripodal tetramine-based dinuclear Zn(ii) complex under an indicator displacement assay approach
Source: Royal Society of Chemistry journal article supplement (doi:10.1039/c3dt52392f), 2014-07-30
Supplement: c3dt52392f1.pdf [file c3dt52392f1.pdf]

# Discriminate sensing of pyrophosphate using a new tripodal tetramine-based dinuclear Zn(II) complex under indicator displacement assay approach

Sarayut Watchasit,<sup>†</sup> Pattira Suktanarak,<sup>‡</sup> Chomchai Suksai,<sup>‡\*</sup> Vithaya Ruangpornvisuti<sup>†</sup> and Thawatchai Tuntulani <sup>†\*</sup>

<sup>†</sup>*Department of Chemistry, Faculty of Science, Chulalongkorn University, Bangkok, Thailand, 10330.*

<sup>‡</sup>*Department of Chemistry and Center of Excellence for Innovation in Chemistry, Faculty of Science, Burapha University, Chonburi, Thailand, 20131.*

## Content

|                   |                                                                                                                                                               |     |
|-------------------|---------------------------------------------------------------------------------------------------------------------------------------------------------------|-----|
| <b>Scheme S1</b>  | Synthetic procedure of ligand <b>L</b> and <b>Zn<sub>2</sub>L</b> .                                                                                           | S3  |
| <b>Figure S1</b>  | <sup>1</sup> H-NMR spectrum of ligand <b>L</b> in CDCl <sub>3</sub> .                                                                                         | S3  |
| <b>Figure S2</b>  | <sup>13</sup> C-NMR Spectrum of ligand <b>L</b> in CDCl <sub>3</sub> .                                                                                        | S4  |
| <b>Figure S3</b>  | <sup>1</sup> H-NMR spectrum of <b>Zn<sub>2</sub>L</b> in 20% (v/v) D <sub>2</sub> O/CD <sub>3</sub> CN.                                                       | S4  |
| <b>Figure S4</b>  | <sup>13</sup> C-NMR spectrum of <b>Zn<sub>2</sub>L</b> in 20% (v/v) D <sub>2</sub> O/CD <sub>3</sub> CN.                                                      | S5  |
| <b>Figure S5</b>  | HMQC-NMR spectrum of <b>Zn<sub>2</sub>L</b> in CD <sub>3</sub> CN.                                                                                            | S5  |
| <b>Table S1</b>   | Total and relative energies of all the B3LYP/LANL2DZ-optimized structures of six conformers of the dimeric 2:2 species.                                       | S6  |
| <b>Figure S6</b>  | DFT/B3LYP/LANL2DZ-optimized structure of the dimeric 2:2 species of C1 conformer.                                                                             | S7  |
| <b>Figure S7</b>  | DFT/B3LYP/LANL2DZ-optimized structure of the dimeric 2:2 species of C2 conformer.                                                                             | S8  |
| <b>Figure S8</b>  | DFT/B3LYP/LANL2DZ-optimized structure of the dimeric 2:2 species of C3 conformer.                                                                             | S9  |
| <b>Figure S9</b>  | DFT/B3LYP/LANL2DZ-optimized structure of the dimeric 2:2 species of P1 conformer.                                                                             | S10 |
| <b>Figure S10</b> | DFT/B3LYP/LANL2DZ-optimized structure of the dimeric 2:2 species of P2 conformer.                                                                             | S11 |
| <b>Figure S11</b> | DFT/B3LYP/LANL2DZ-optimized structure of the dimeric 2:2 species of P3 conformer.                                                                             | S12 |
| <b>Figure S12</b> | <sup>1</sup> H NMR spectra of 1:1 ratio of ensemble formation between <b>Zn<sub>2</sub>L</b> :MTB (5 mM) upon addition of various concentration of <b>PPi</b> | S13 |

(0.05 M) in 20% (v/v) D<sub>2</sub>O:CD<sub>3</sub>CN.

|                   |                                                                                                                                                                                                                                                                                                                                                                                                    |     |
|-------------------|----------------------------------------------------------------------------------------------------------------------------------------------------------------------------------------------------------------------------------------------------------------------------------------------------------------------------------------------------------------------------------------------------|-----|
| <b>Figure S13</b> | <sup>1</sup> H NMR spectra of 1:2 ratio of ensemble formation between <b>Zn<sub>2</sub>L:2MTB</b> (5 mM) upon addition of various concentration of <b>PPi</b> (0.05 M) in 20% (v/v) D <sub>2</sub> O:CD <sub>3</sub> CN.                                                                                                                                                                           | S14 |
| <b>Figure S14</b> | <sup>31</sup> P NMR spectra of [ <b>Zn<sub>2</sub>L·MTB</b> ] (5 mM) upon addition of various concentration of <b>PPi</b> (0.05 M) in 20% (v/v) D <sub>2</sub> O:CD <sub>3</sub> CN.                                                                                                                                                                                                               | S15 |
| <b>Figure S15</b> | <sup>31</sup> P NMR spectra of [ <b>Zn<sub>2</sub>L·2MTB</b> ] (5 mM) upon addition of various concentration of <b>PPi</b> (0.05 M) in 20% (v/v) D <sub>2</sub> O:CD <sub>3</sub> CN.                                                                                                                                                                                                              | S16 |
| <b>Figure S16</b> | (a) UV/vis spectra obtained by addition of <b>Zn<sub>2</sub>L</b> (400 μM) to a solution of indicator <b>PV</b> (20 μM) in HEPES buffered pH 7.4 in 20% (v/v) H <sub>2</sub> O/CH <sub>3</sub> CN solution, (b) Job's plot analysis of <b>PV-Zn<sub>2</sub>L</b> ensemble. (c) A plot of absorption against concentration of <b>Zn<sub>2</sub>L</b> titrated in <b>PV Zn<sub>2</sub>L</b> ensemble | S17 |
| <b>Figure S17</b> | (a) UV/vis spectra obtained by addition of <b>Zn<sub>2</sub>L</b> (400 μM) to a solution of indicator <b>BPG</b> (20 μM) in HEPES buffered pH 7.4 in 20% (v/v) H <sub>2</sub> O/CH <sub>3</sub> CN solution, (b) Job's plot analysis of <b>BPG-Zn<sub>2</sub>L</b> ensemble, C) A plot of absorption against concentration of <b>Zn<sub>2</sub>L</b> titrated in <b>BPG</b> .                      | S18 |
| <b>Figure S18</b> | (a) UV/vis spectra obtained by addition of <b>Zn<sub>2</sub>L</b> (400 μM) to a solution of indicator <b>XO</b> (20 μM) in HEPES buffered pH 7.4 in 20% (v/v) H <sub>2</sub> O/CH <sub>3</sub> CN solution, (b) Job's plot analysis of <b>XO-Zn<sub>2</sub>L</b> ensemble, C) A plot of absorption against concentration of <b>Zn<sub>2</sub>L</b> titrated in <b>XO</b> .                         | S19 |
| <b>Figure S19</b> | A plot of absorption against concentration of <b>Zn<sub>2</sub>L</b> titrated in <b>MTB</b> .                                                                                                                                                                                                                                                                                                      | S19 |
| <b>Figure S20</b> | Calibration curve for detection of <b>PPi</b> using <b>MTB-Zn<sub>2</sub>L</b> ensemble.                                                                                                                                                                                                                                                                                                           | S20 |

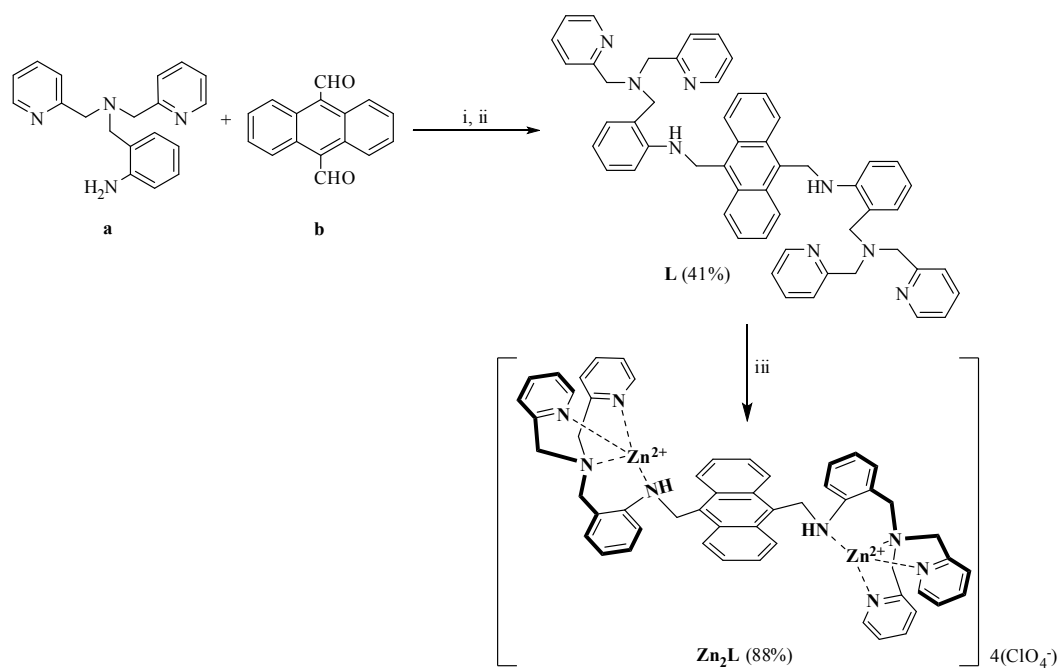

**Scheme S1.** Synthetic procedure of **L** and **Zn<sub>2</sub>L**. (i) acetonitrile, reflux 12 h, (ii) NaBH<sub>4</sub>, MeOH, reflux 12 h, (iii) Zn(ClO<sub>4</sub>)<sub>2</sub>, EtOH, reflux 12 h.

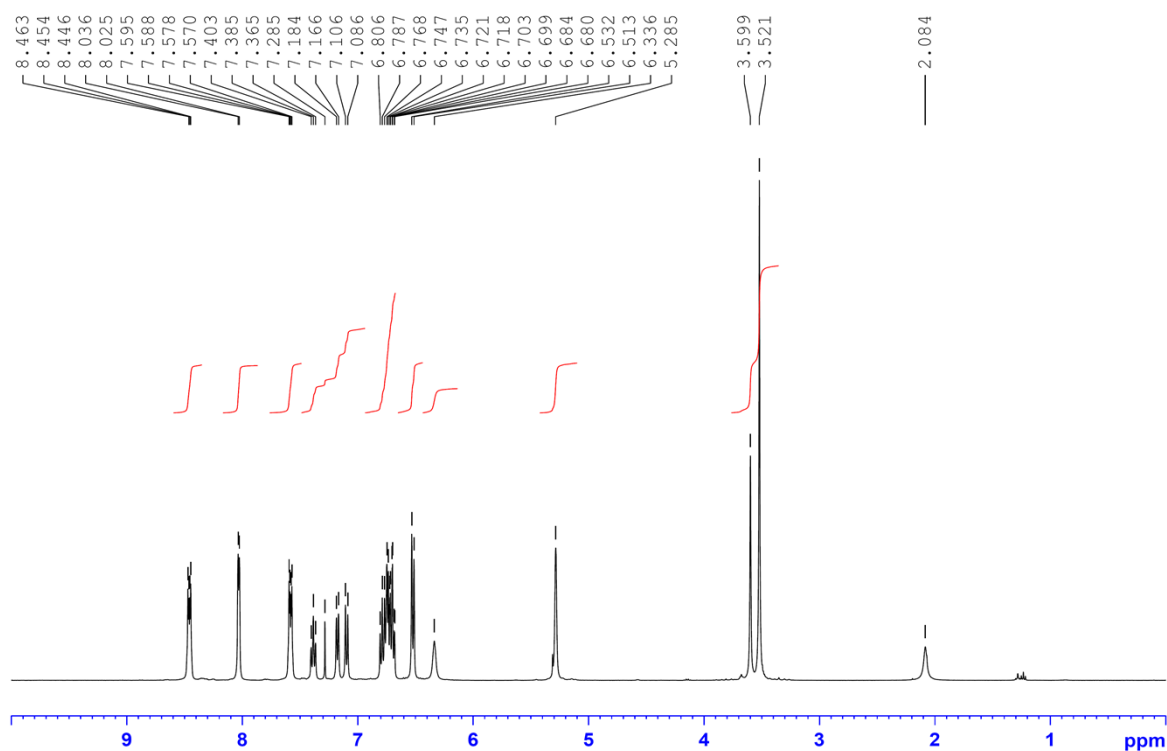

**Figure S1.** <sup>1</sup>H-NMR spectrum of ligand **L** in CDCl<sub>3</sub>.

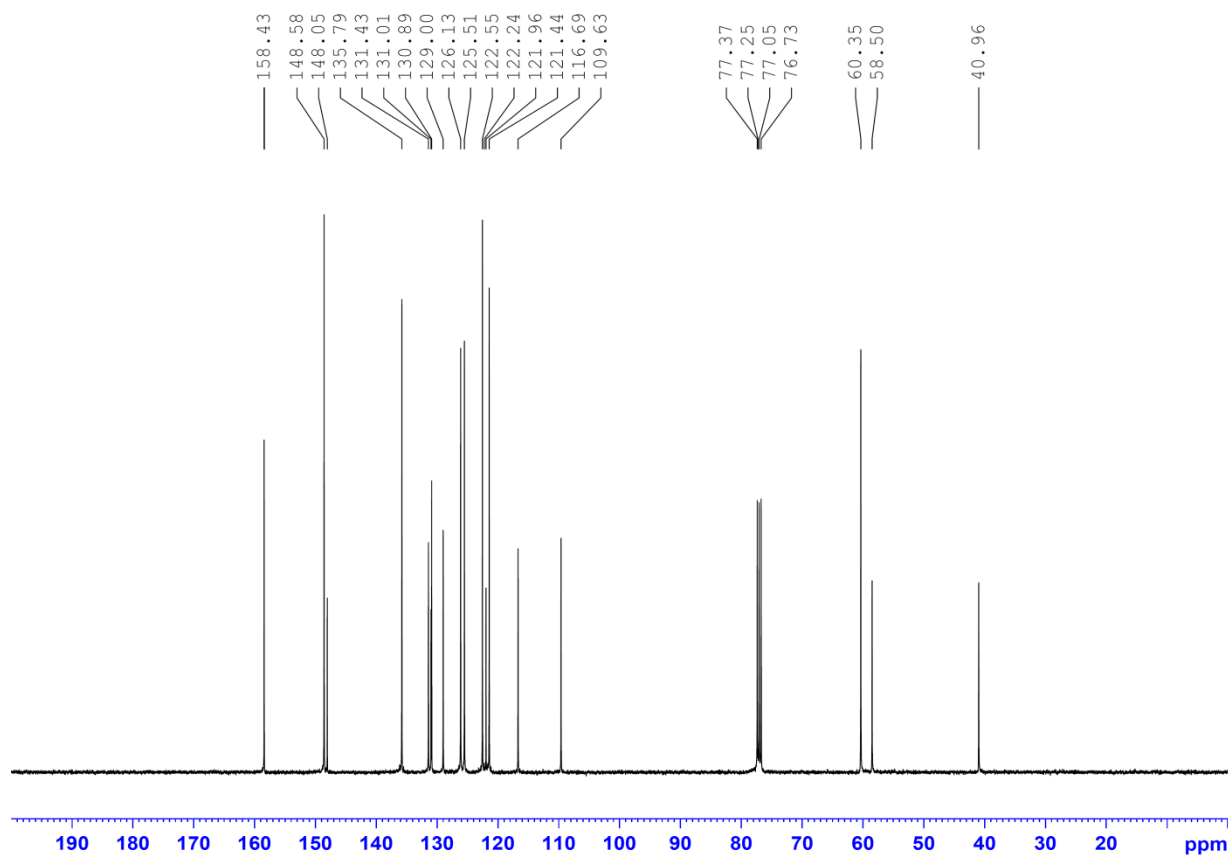

**Figure S2.**  $^{13}\text{C}$ -NMR Spectrum of ligand **L** in  $\text{CDCl}_3$ .

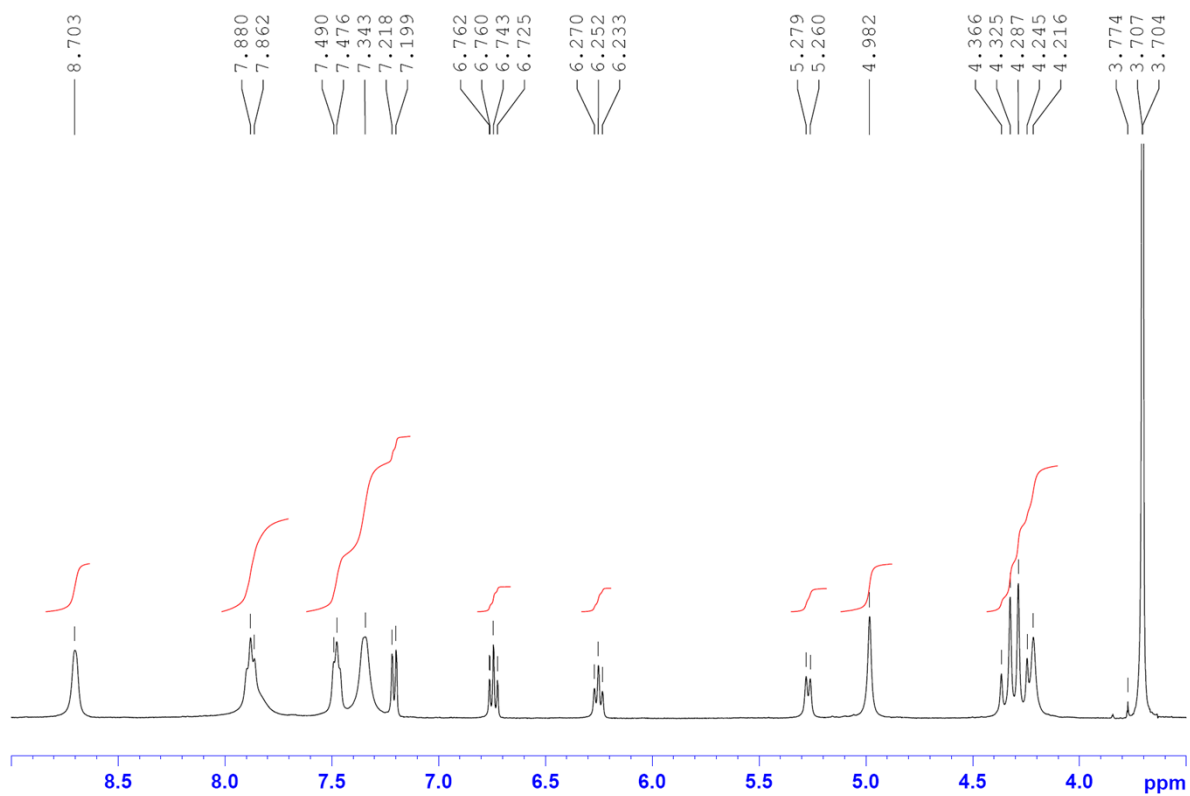

**Figure S3.**  $^1\text{H}$ -NMR spectrum of  $\text{Zn}_2\text{L}$  in 20% (v/v)  $\text{D}_2\text{O}/\text{CD}_3\text{CN}$ .

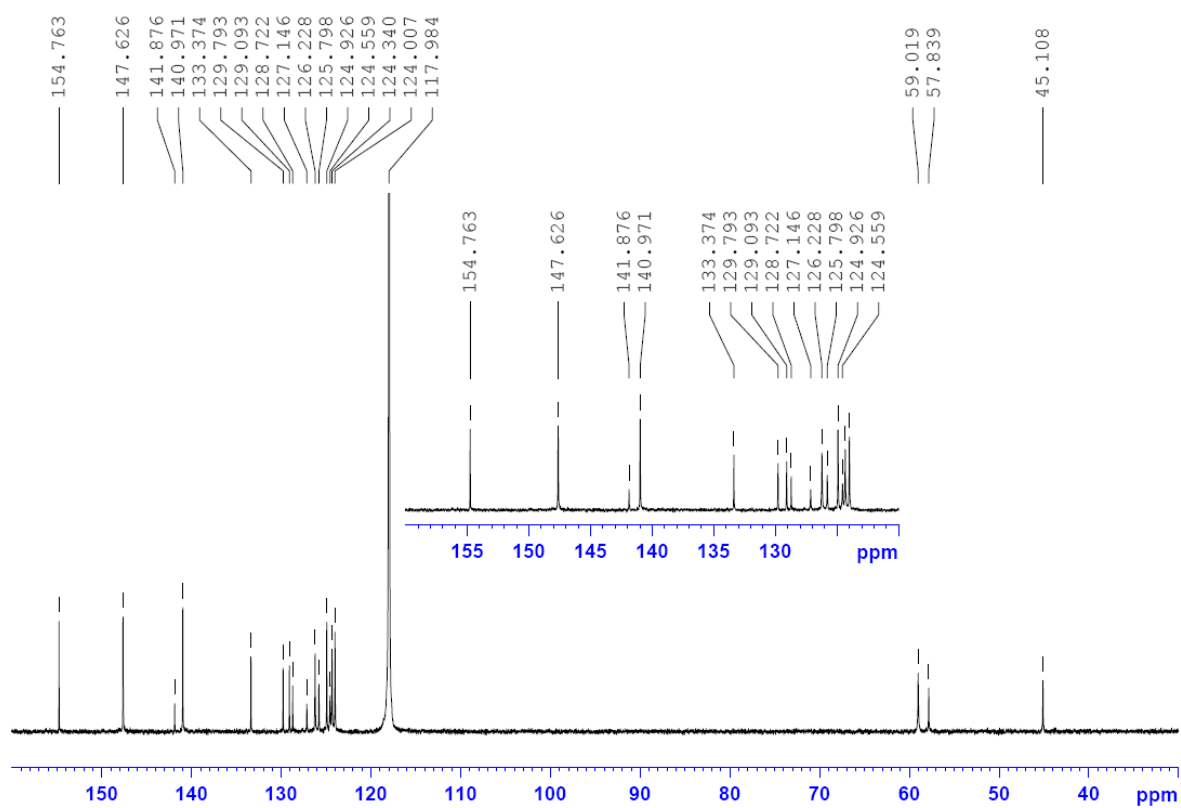

Figure S4. <sup>13</sup>C-NMR spectrum of **Zn<sub>2</sub>L** in 20% (v/v) D<sub>2</sub>O/CD<sub>3</sub>CN.

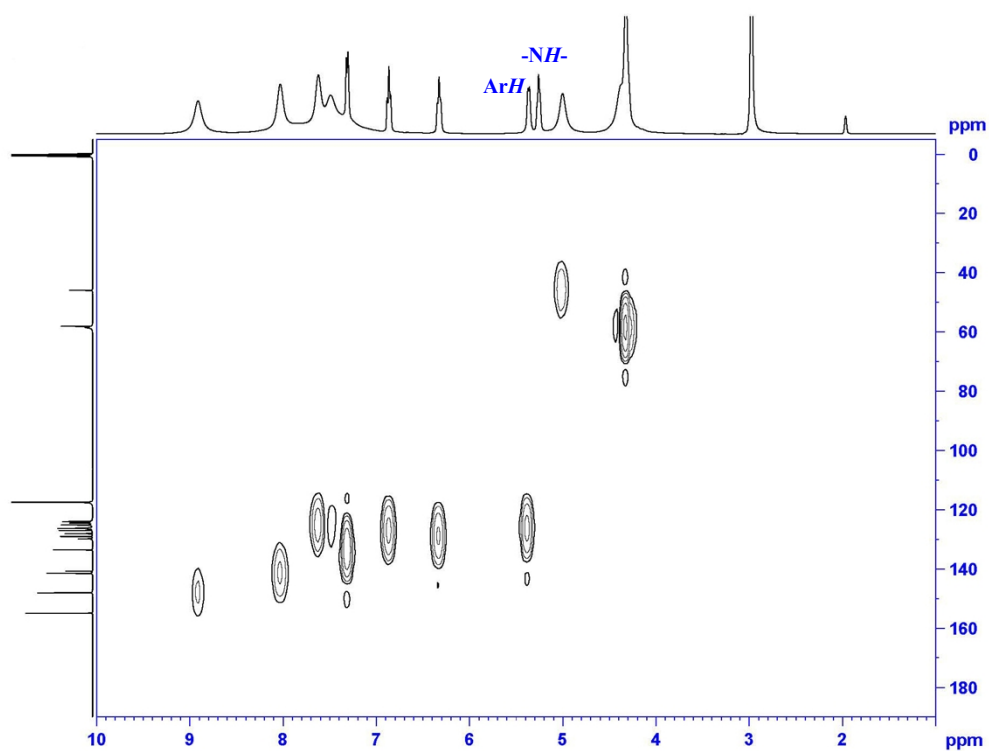

Figure S5. HMQC-NMR spectrum of **Zn<sub>2</sub>L** in CD<sub>3</sub>CN.

**Table S1** Total and relative energies of all the B3LYP/LANL2DZ–optimized structures of six conformers of the dimeric 2:2 species.

| Conformers <sup>a</sup> | $E_{\text{total}}$ <sup>b</sup> | $\Delta E_{\text{rel}}$ <sup>c</sup> |
|-------------------------|---------------------------------|--------------------------------------|
| C1                      | -6392.7827862                   | 75.37                                |
| C2 <sup>d</sup>         | -6392.9028947                   | 0.00                                 |
| C3                      | -6392.8176487                   | 53.49                                |
| P1                      | -6392.7687205                   | 84.20                                |
| P2                      | -6392.7596734                   | 89.87                                |
| P3                      | -6392.7567471                   | 91.71                                |

<sup>a</sup> Conformers are named according to cross (C) or parallel (P) alignment of two anthracene units of the dimeric species. <sup>b</sup> Total energies are in au. <sup>c</sup> Relative energies compared with the most stable conformer (C2), in kcal/mol. <sup>d</sup> The most stable conformer.

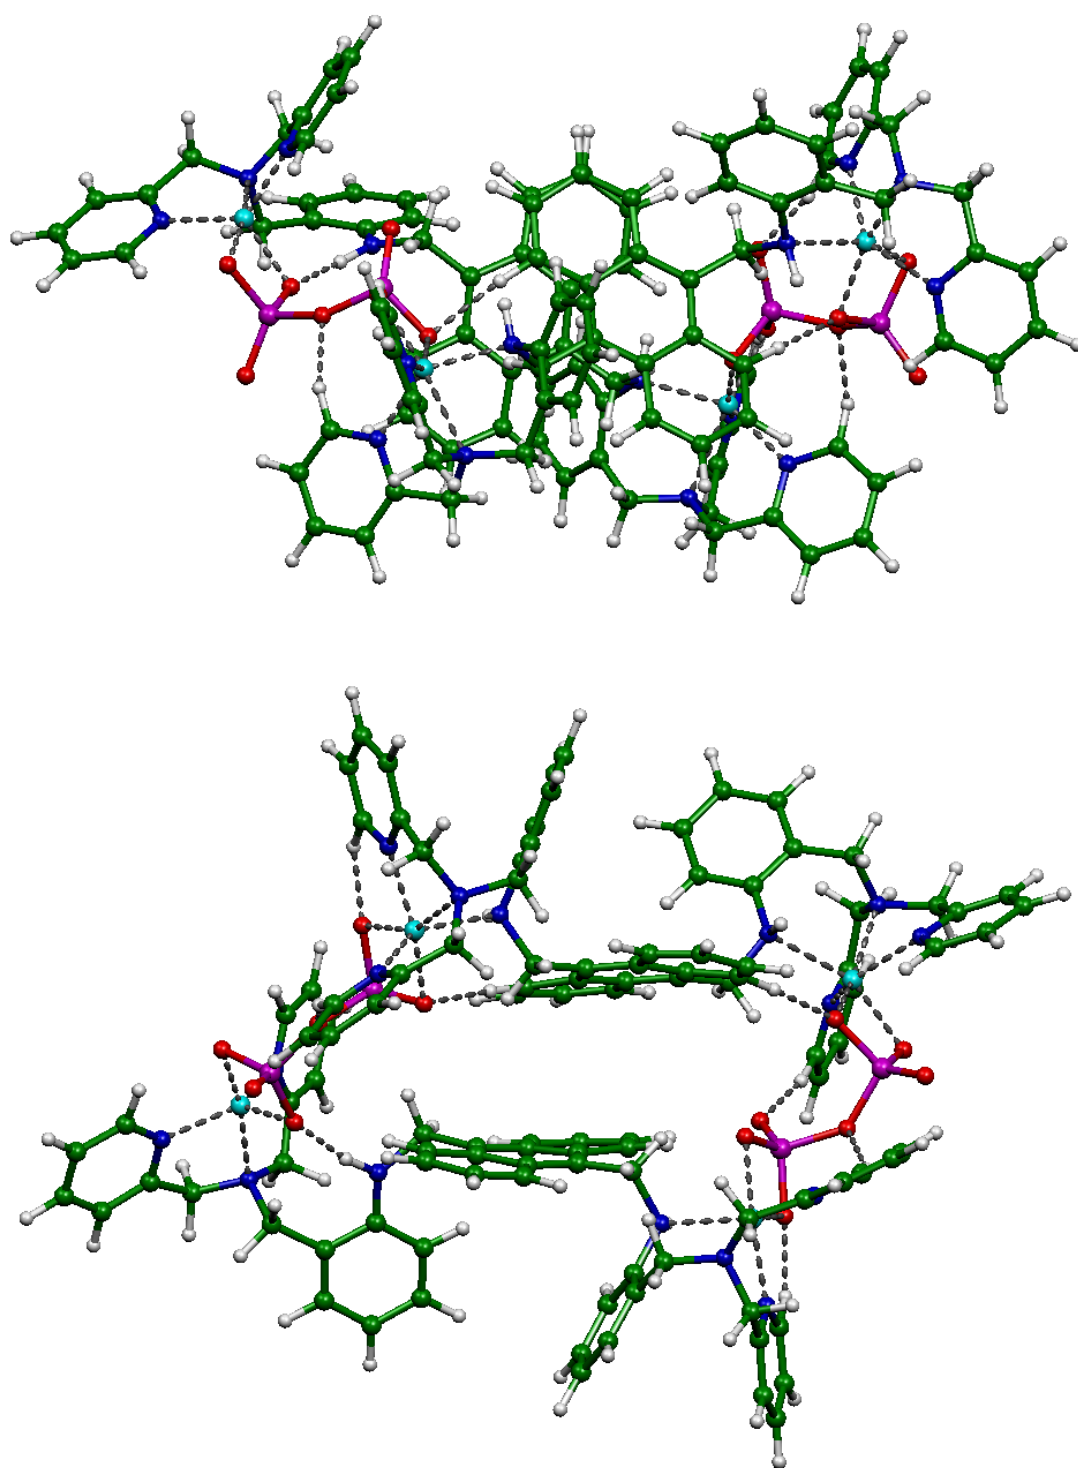

**Figure S6.** DFT/B3LYP/LANL2DZ-optimized structure of the dimeric 2:2 species of C1 conformer. Top and bottom images are top and front views, respectively.

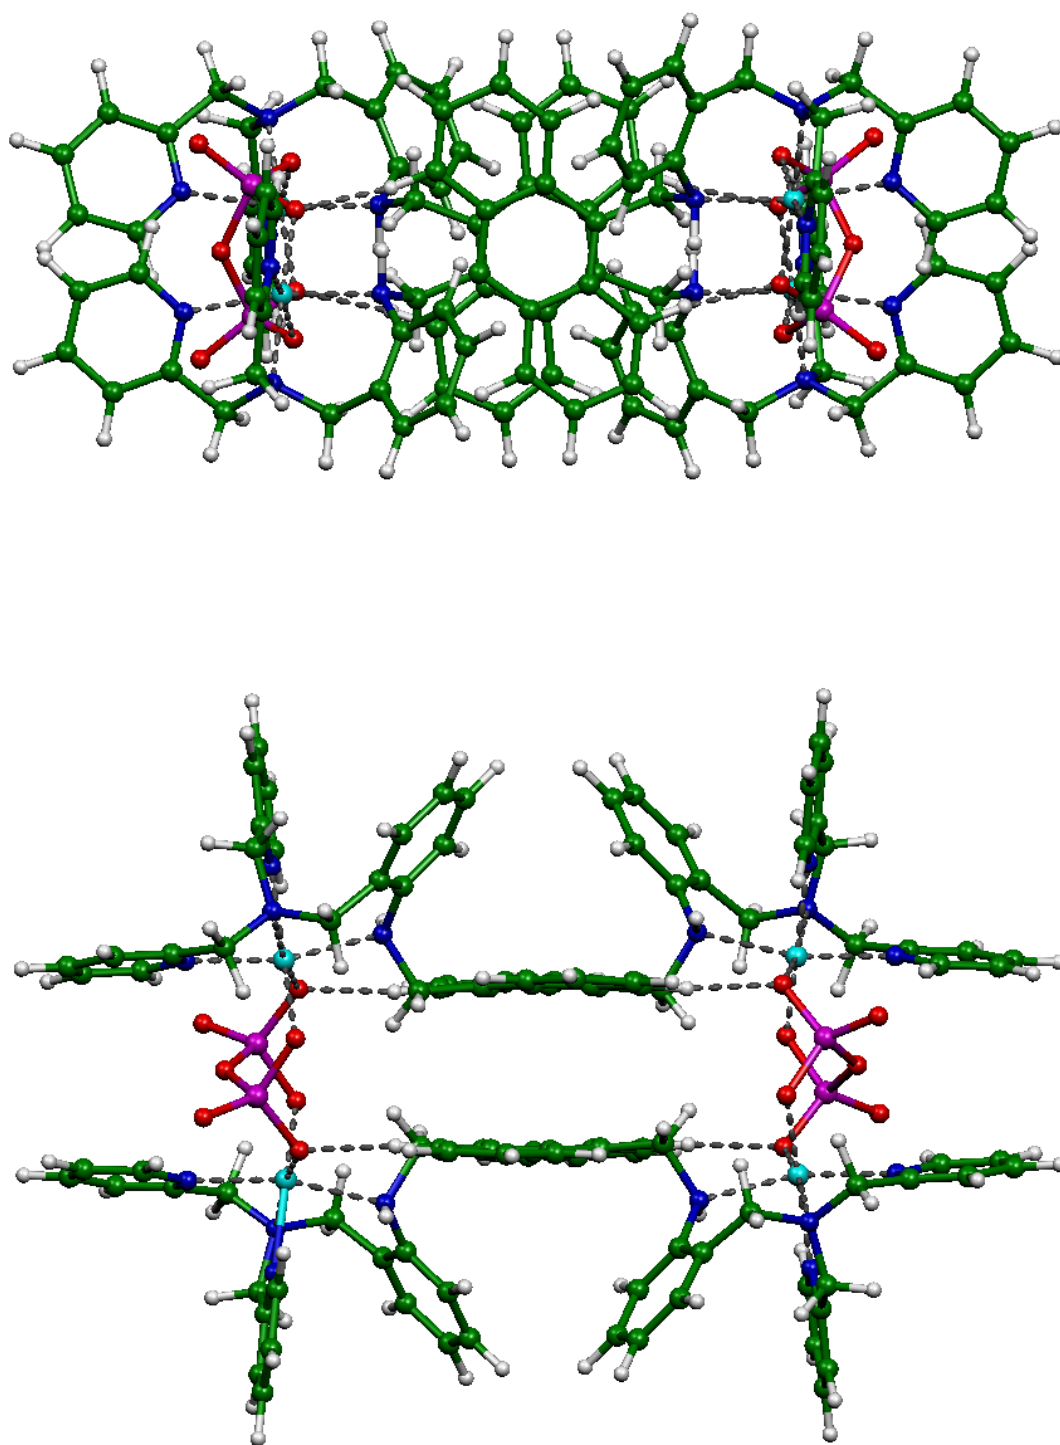

**Figure S7.** DFT/B3LYP/LANL2DZ-optimized structure of the dimeric 2:2 species of C2 conformer as the most stable one. Top and bottom images are top and front views, respectively.



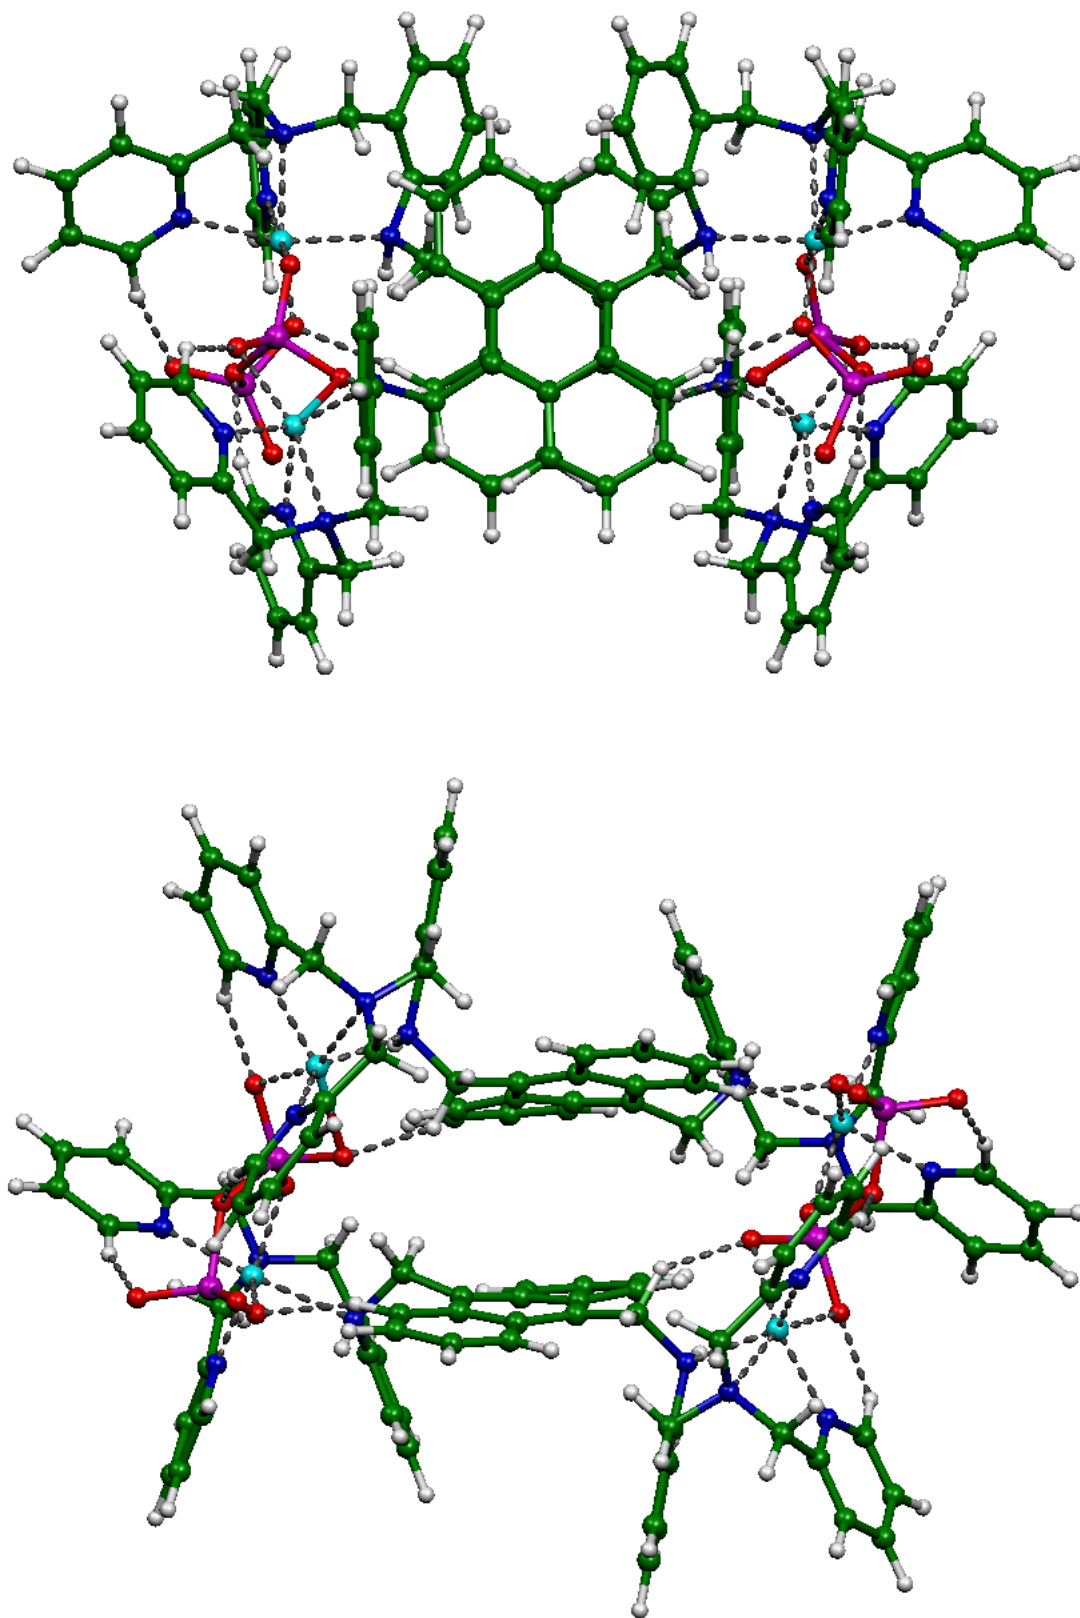

**Figure S8.** DFT/B3LYP/LANL2DZ-optimized structure of the dimeric 2:2 species of C3 conformer. Top and bottom images are top and front views, respectively.

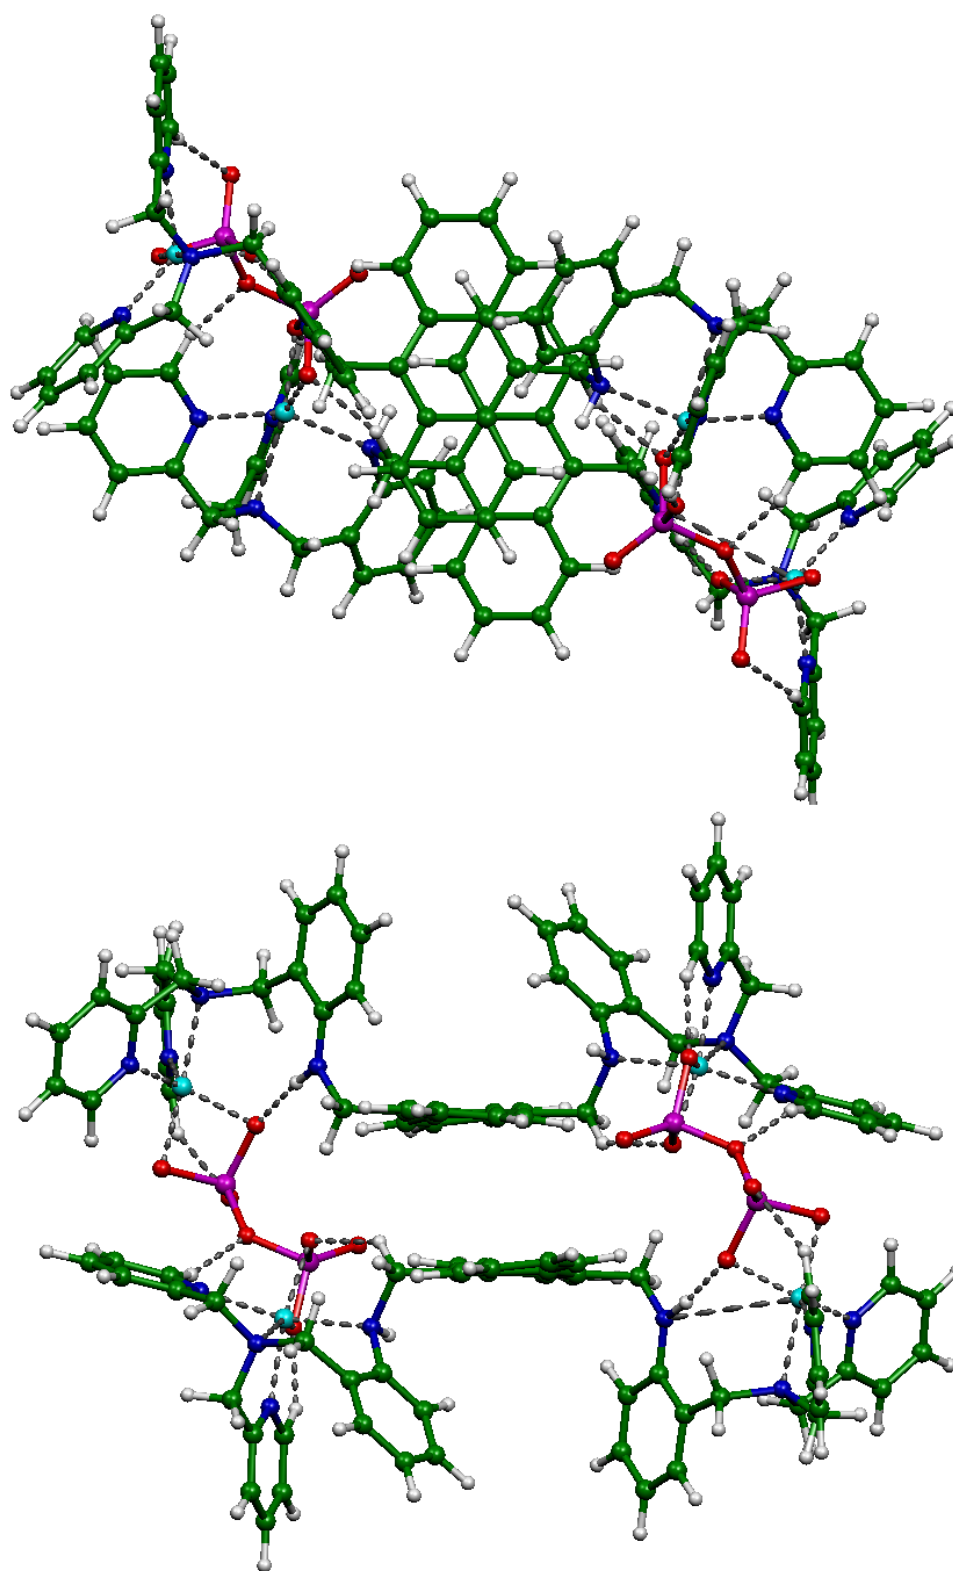

**Figure S9.** DFT/B3LYP/LANL2DZ-optimized structure of the dimeric 2:2 species of P1 conformer. Top and bottom images are top and front views, respectively.

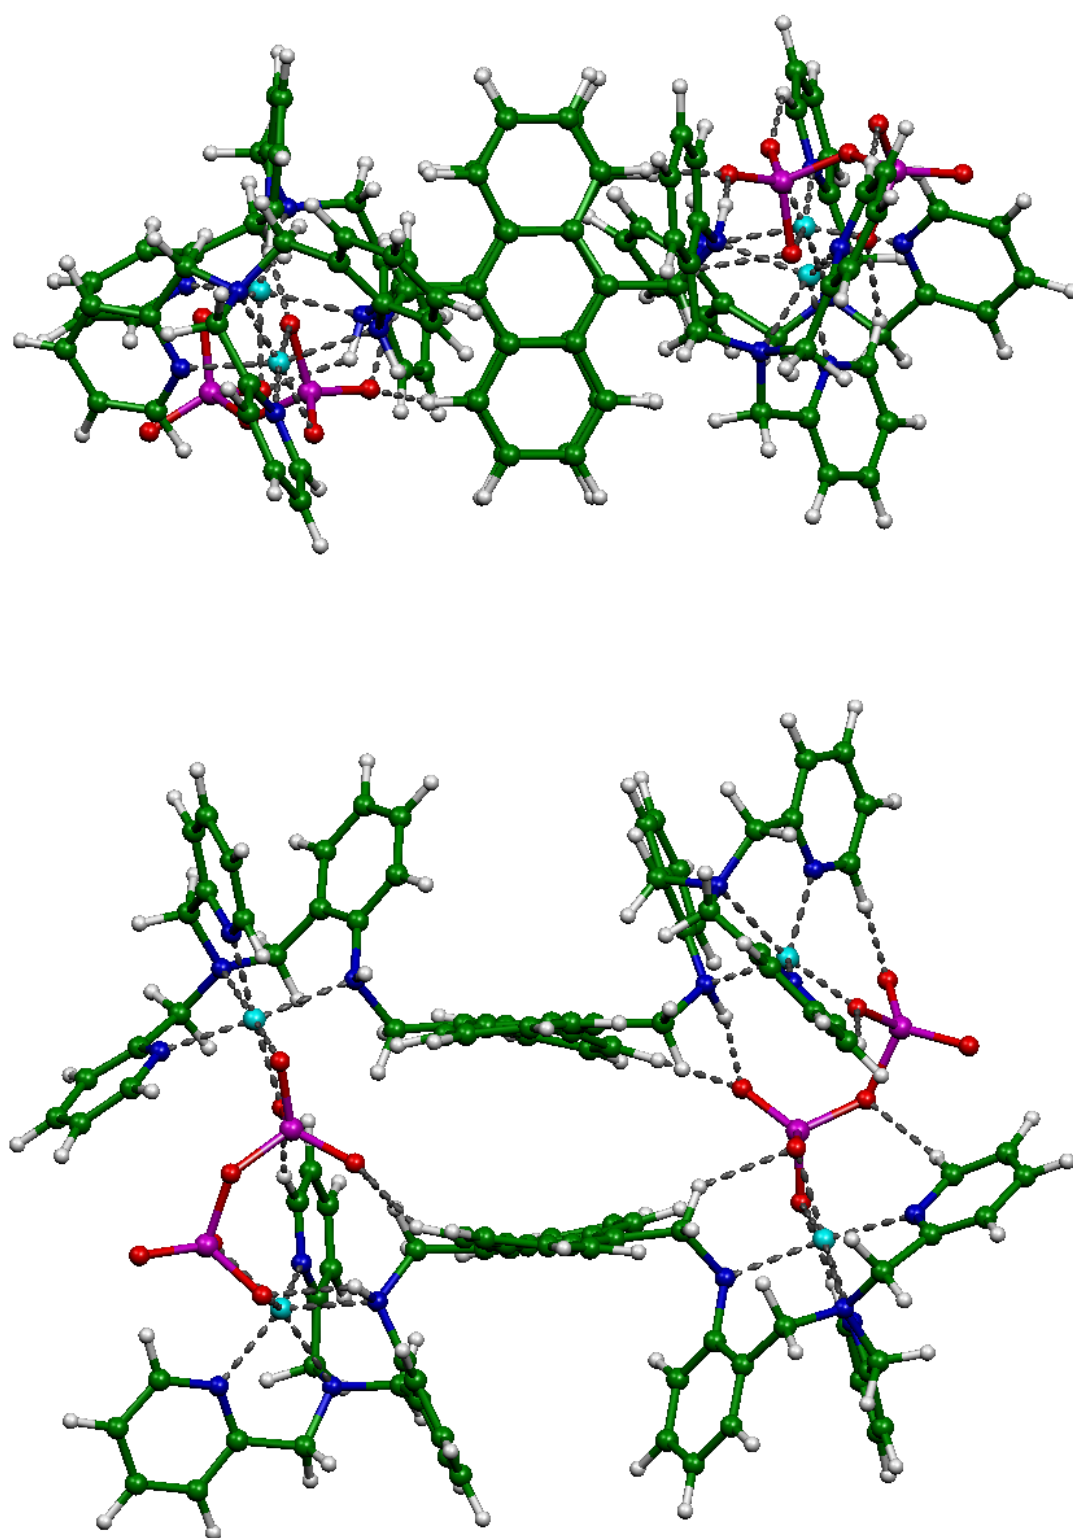

**Figure S10.** DFT/B3LYP/LANL2DZ-optimized structure of the dimeric 2:2 species of P2 conformer. Top and bottom images are top and front views, respectively.

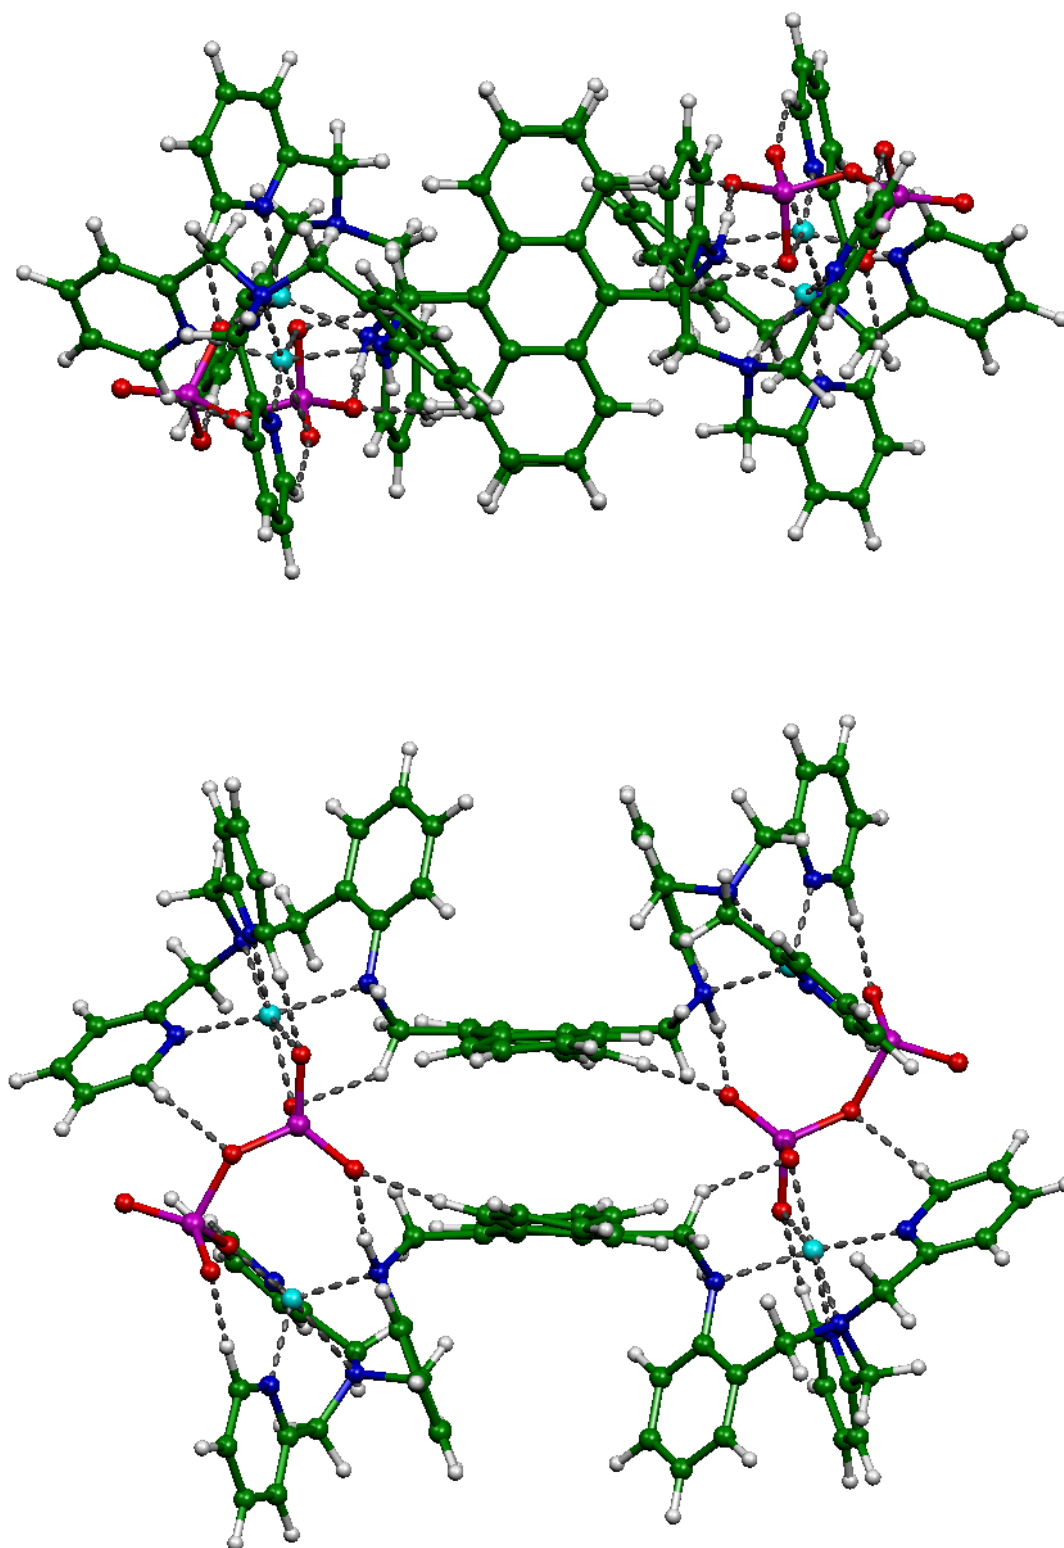

**Figure S11.** DFT/B3LYP/LANL2DZ-optimized structure of the dimeric 2:2 species of P3 conformer. Top and bottom images are top and front views, respectively.

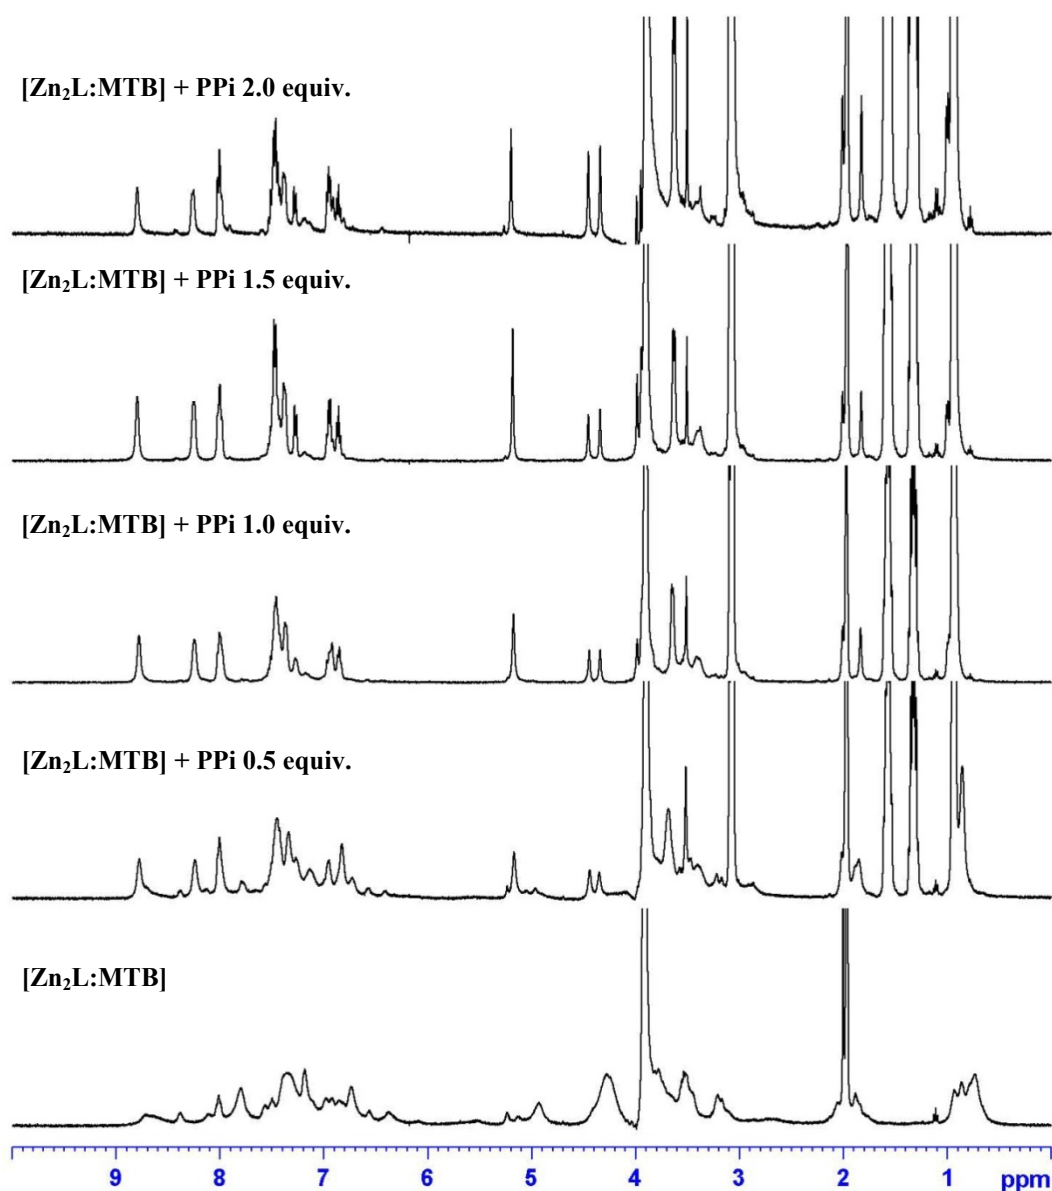

**Figure S12.**  $^1\text{H}$  NMR spectra of 1:1 ratio of ensemble formation between  $\text{Zn}_2\text{L:MTB}$  (5 mM) upon addition of various concentrations of **PPI** (0.05 M) in 20% (v/v)  $\text{D}_2\text{O}:\text{CD}_3\text{CN}$ .

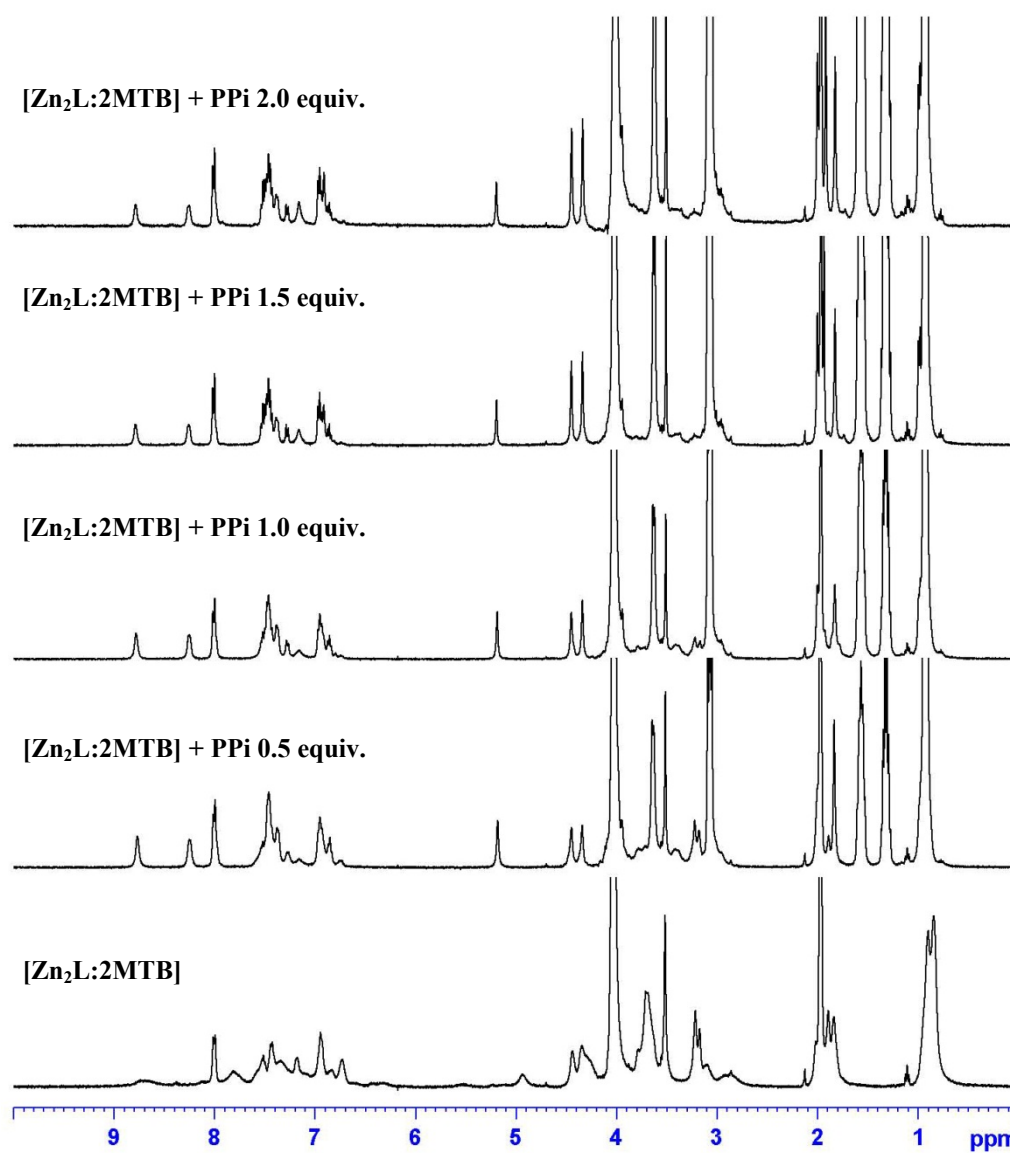

**Figure S13.**  $^1\text{H}$  NMR spectra of 1:2 ratio of ensemble formation between  $\text{Zn}_2\text{L}:\text{MTB}$  (5 mM) upon addition of various concentration of **PPI** (0.05 M) in 20% (v/v)  $\text{D}_2\text{O}:\text{CD}_3\text{CN}$ .

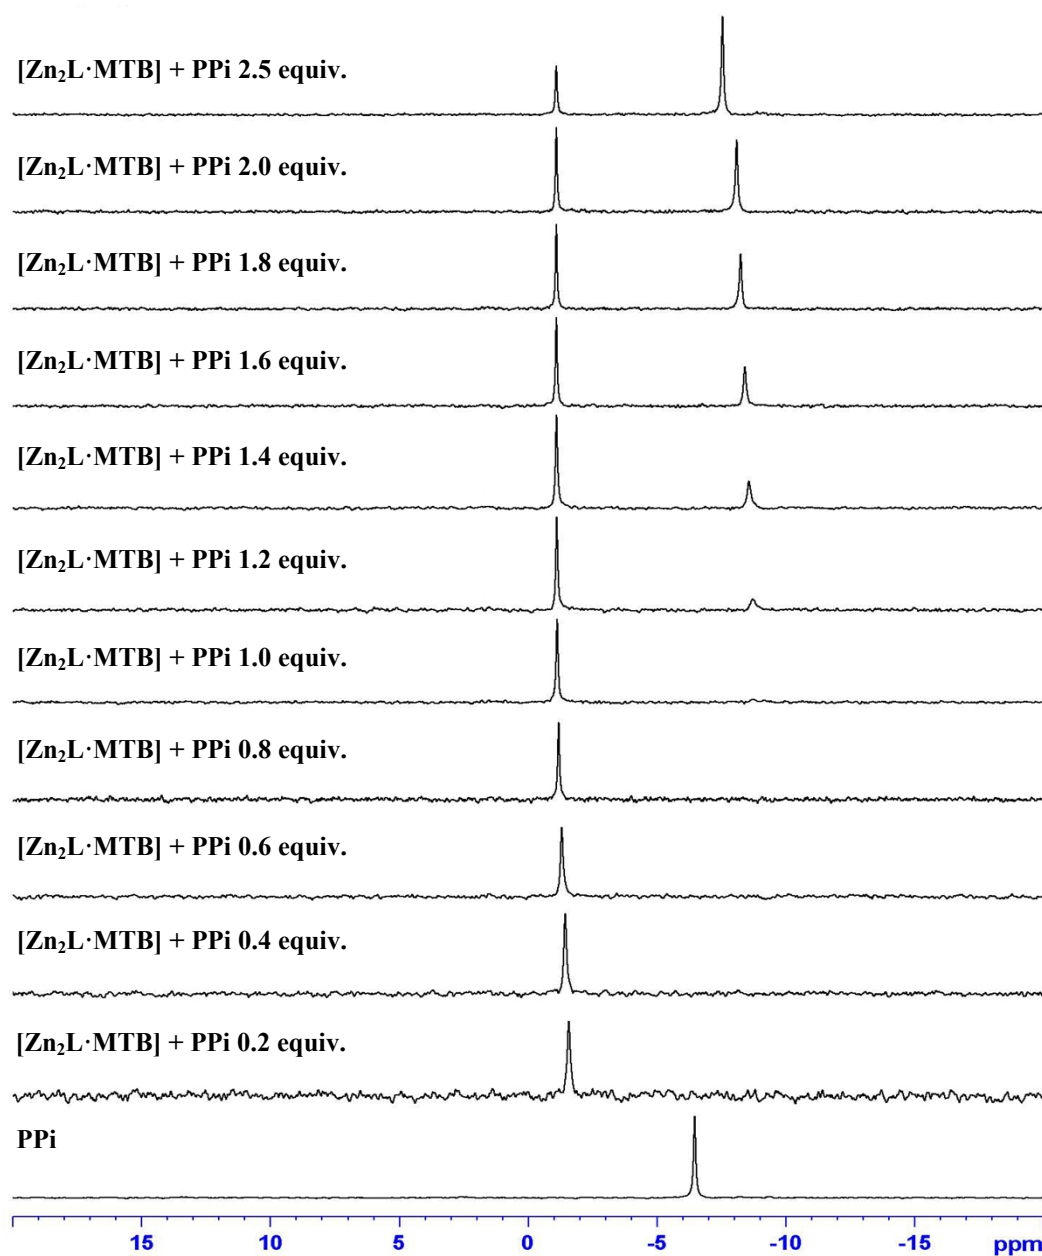

**Fig S14.**  $^{31}\text{P}$  NMR spectra of  $[\text{Zn}_2\text{L}\cdot\text{MTB}]$  (5 mM) upon addition of various concentrations of **PPI** (0.05 M) in 20% (v/v)  $\text{D}_2\text{O}:\text{CD}_3\text{CN}$ .



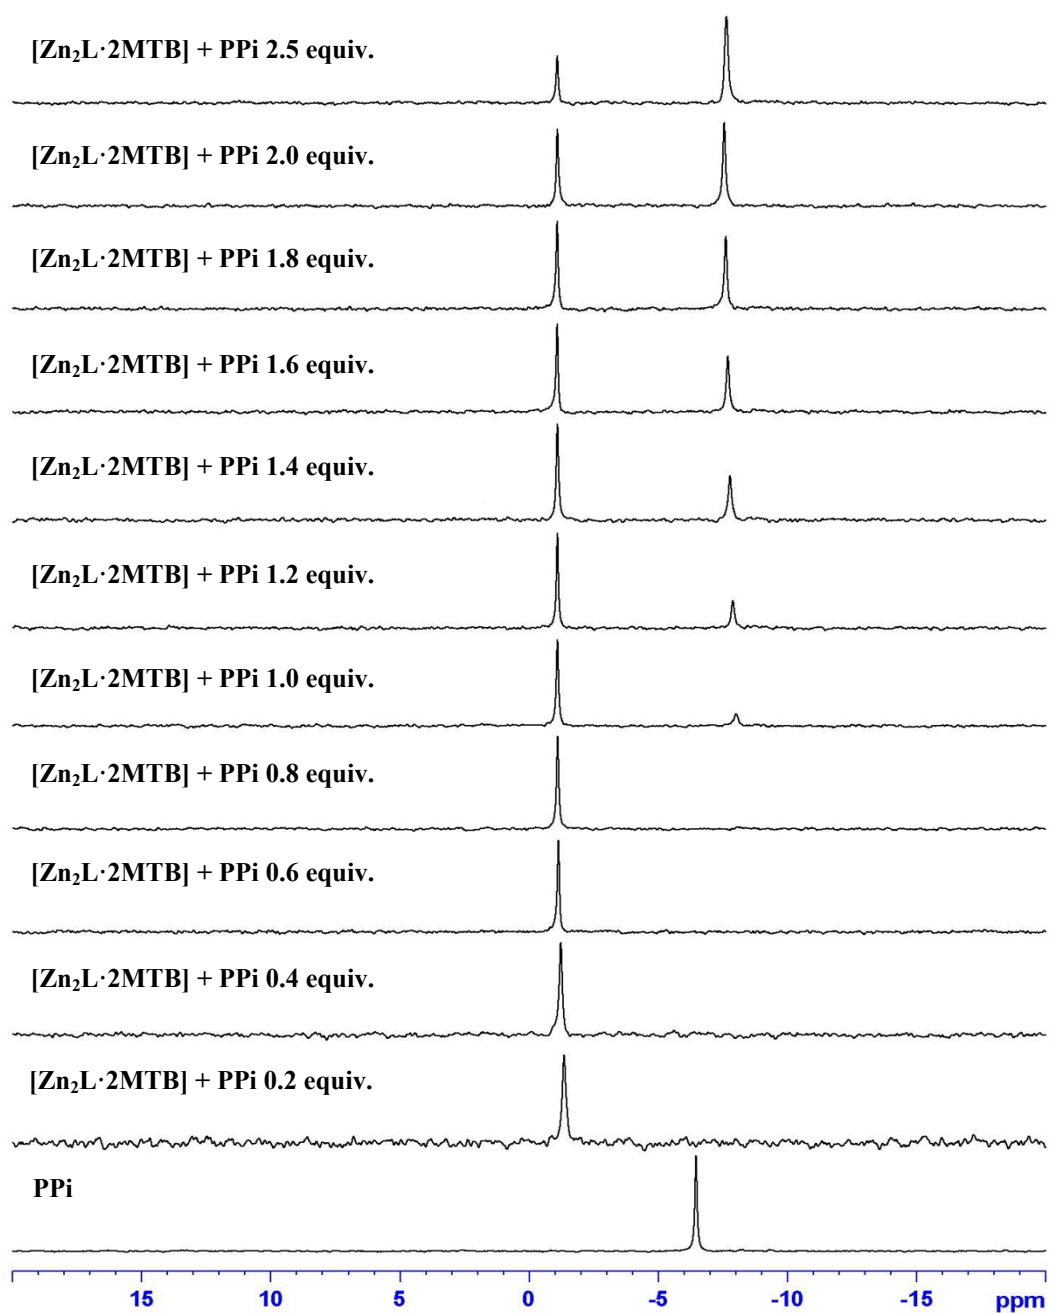

**Fig S15.**  $^{31}\text{P}$  NMR spectra of  $[\text{Zn}_2\text{L}\cdot 2\text{MTB}]$  (5 mM) upon addition of various concentrations of **PPI** (0.05 M) in 20% (v/v)  $\text{D}_2\text{O}:\text{CD}_3\text{CN}$ .



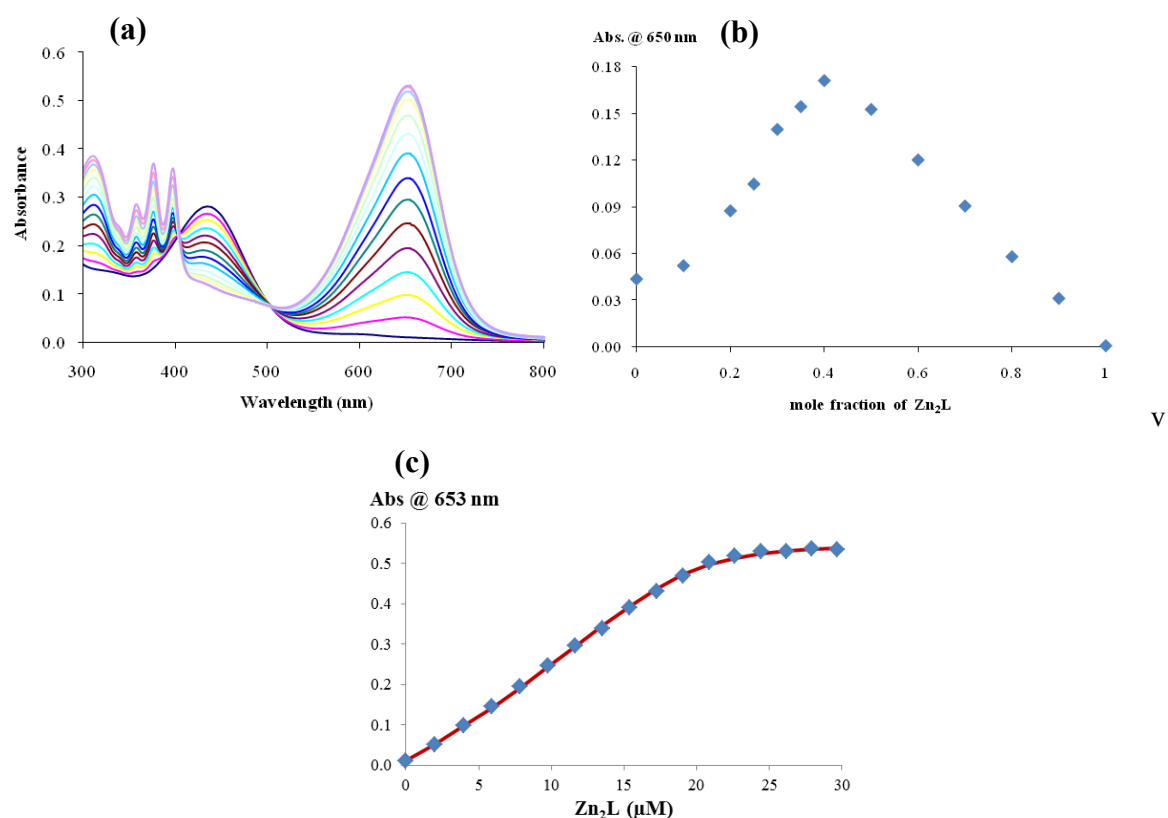

**Figure S16.** (a) UV/vis spectra obtained by addition of  $Zn_2L$  (400  $\mu M$ ) to a solution of indicator **PV** (20  $\mu M$ ) in HEPES buffered pH 7.4 in 20% (v/v)  $H_2O/CH_3CN$  solution, (b) Job's plot analysis of **PV**- $Zn_2L$  ensemble, (c) A plot of absorption against concentration of  $Zn_2L$  titrated in **PV**. The red solid line is nonlinear least-squares fittings of the titration profiles using SPECFIT32 program.

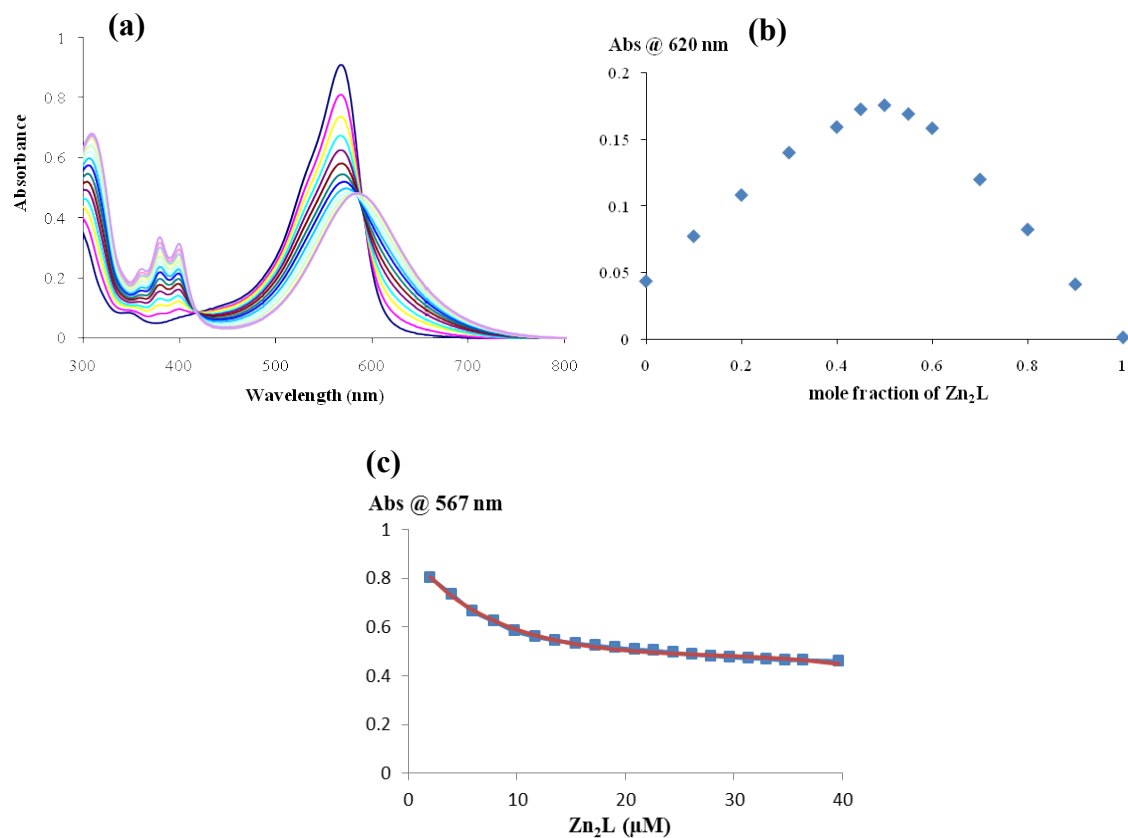

**Figure S17.** (a) UV/vis spectra obtained by addition of  $\text{Zn}_2\text{L}$  ( $400\ \mu\text{M}$ ) to a solution of indicator **BPG** ( $20\ \mu\text{M}$ ) in HEPES buffered pH 7.4 in 20% (v/v)  $\text{H}_2\text{O}/\text{CH}_3\text{CN}$  solution, (b) Job's plot analysis of **BPG**- $\text{Zn}_2\text{L}$  ensemble, (c) A plot of absorption against concentration of  $\text{Zn}_2\text{L}$  titrated in **BPG**. The red solid line is nonlinear least-squares fittings of the titration profiles using SPECFIT32 program.

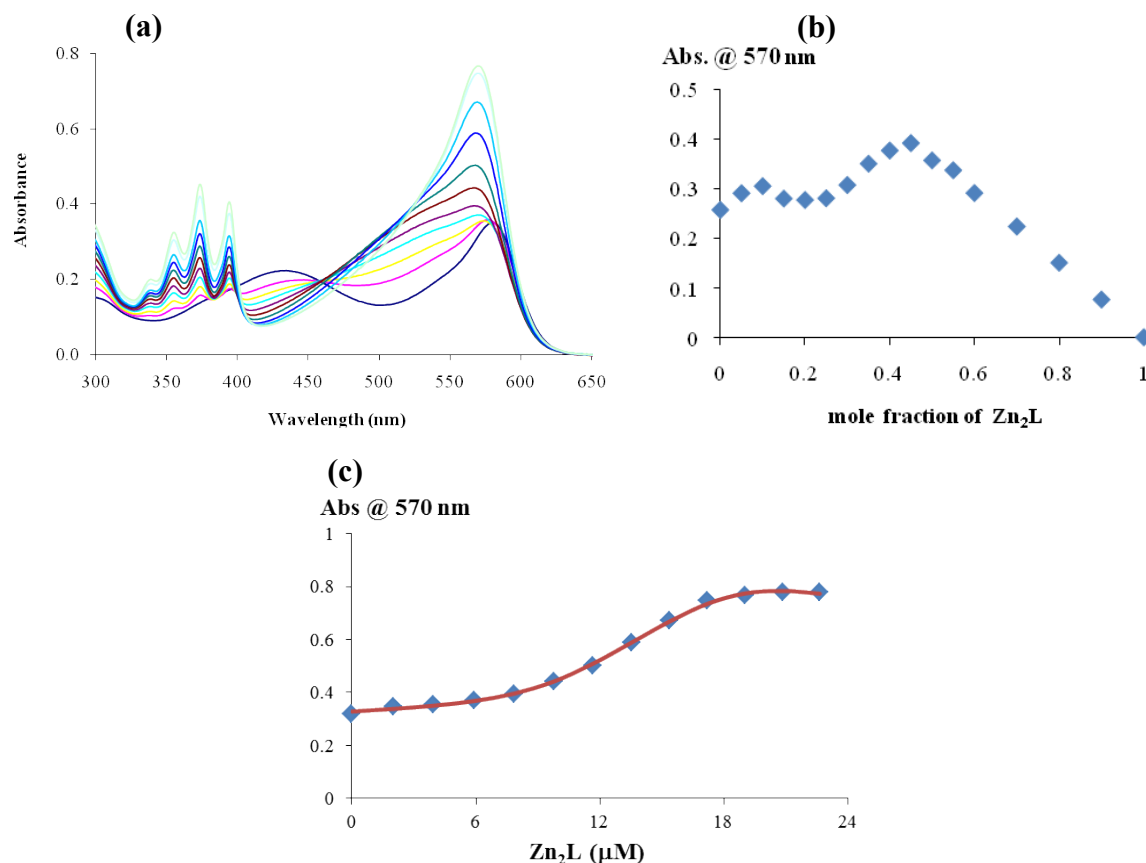

**Figure S18.** (a) UV/vis spectra obtained by addition of  $\text{Zn}_2\text{L}$  (400  $\mu\text{M}$ ) to a solution of indicator **XO** (20  $\mu\text{M}$ ) in HEPES buffered pH 7.4 in 80/20 (% v/v)  $\text{CH}_3\text{CN}/\text{H}_2\text{O}$  solution, (b) Job's plot analysis of **XO**- $\text{Zn}_2\text{L}$  ensemble, (c) A plot of absorption against concentration of  $\text{Zn}_2\text{L}$  titrated in **XO**. The red solid line is nonlinear least-squares fittings of the titration profiles using SPECFIT32 program.

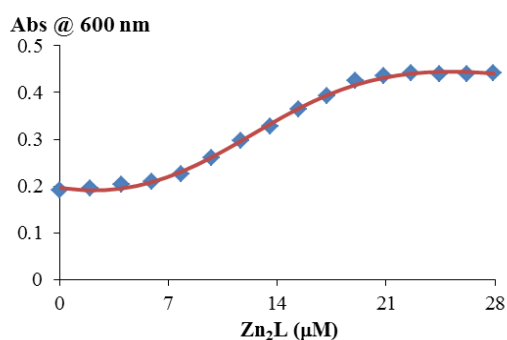

**Figure S19.** A plot of absorption against concentration of  $\text{Zn}_2\text{L}$  titrated in **MTB**. The red solid line is nonlinear least-squares fittings of the titration profiles using SPECFIT32 program.

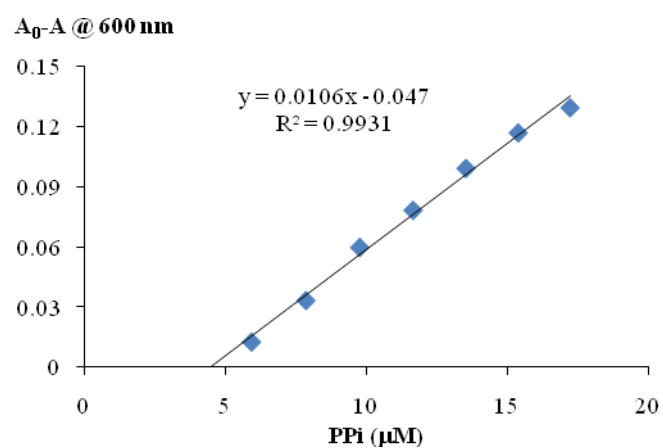

**Figure S20.** Calibration curve for detection of **PPI** using **MTB-Zn<sub>2</sub>L** ensemble.
